# Supplementary material for: Transient Homonymous Superior Quadrantanopsia in Nonketotic Hyperglycemia: A Case Report and Systematic Review
Source: PubMed Central journal article supplement — J Clin Neurol. 2020 Sep 9;16(4):599–604. doi: 10.3988/jcn.2020.16.4.599 (PMC7541982; doi:10.3988/jcn.2020.16.4.599), 2020-09-09
Supplement: jcn-16-599-s001.pdf [file jcn-16-599-s001.pdf]

**Supplementary Table 1.** Literature review for visual field defects in nonketotic hyperglycemia

| First author (year)                | Sex/age (years) | Visual field defect |                                                                                   | Positive visual symptom |                  |                      | Other visual symptoms                                            |
|------------------------------------|-----------------|---------------------|-----------------------------------------------------------------------------------|-------------------------|------------------|----------------------|------------------------------------------------------------------|
|                                    |                 | Side                | Type (homonymous)                                                                 | Macular splitting       | Visual phosphene | Visual hallucination |                                                                  |
| Our report                         | M/61            | R                   | Superior quadrantanopsia                                                          | +                       | +                | -                    | -                                                                |
| Maccario (1968) <sup>1</sup>       | M/73            | R                   | Hemianopsia                                                                       | ?                       | -                | +                    | -                                                                |
| Berkovic (1984) <sup>2</sup>       | F/80            | R                   | Hemianopsia                                                                       | ?                       | -                | -                    | -                                                                |
| Johnson (1988) <sup>3</sup>        | M/57            | R                   | Hemianopsia                                                                       | ?                       | +                | +                    | Palinopsia, spatial disorientation                               |
| Harden (1991) <sup>4</sup>         | M/28            | L                   | Hemianopsia                                                                       | ?                       | +                | -                    | -                                                                |
| Harden (1991) <sup>4</sup>         | F/68            | L                   | Hemianopsia                                                                       | ?                       | +                | -                    | -                                                                |
| Duncan (1991) <sup>5</sup>         | F/43            | L                   | Hemianopsia                                                                       | ?                       | +                | +                    | -                                                                |
| Brazis (2000) <sup>6</sup>         | M/75            | L                   | Hemianopsia (OU) with superior quadrantanopsia (OS)                               | +                       | -                | +                    | Polyopia, achromatopsia                                          |
| Seo (2003) <sup>7</sup>            | M/60            | L                   | Hemianopsia                                                                       | ?                       | +                | -                    | -                                                                |
| Freedman (2004) <sup>8</sup>       | F/72            | L                   | Hemianopsia                                                                       | +                       | +                | -                    | Visual perseveration                                             |
| Lavin (2005) <sup>9</sup>          | M/39            | L                   | Visual field defects alternating between hemianopsia and inferior quadrantanopsia | +, -*                   | -                | +                    | -                                                                |
| Lavin (2005) <sup>9</sup>          | M/54            | L                   | Hemianopsia                                                                       | +                       | +                | +                    | ?                                                                |
| Lavin (2005) <sup>9</sup>          | M/34            | ?                   | Hemianopsia                                                                       | +                       | -                | -                    | ?                                                                |
| Lavin (2005) <sup>9</sup>          | M/69            | ?                   | Hemianopsia                                                                       | -                       | +                | +                    | ?                                                                |
| Wang (2005) <sup>10</sup>          | F/59            | R                   | Hemianopsia                                                                       | ?                       | +                | +                    | Visual distortion                                                |
| Raghavendra (2007) <sup>11</sup>   | F/42            | R                   | Hemianopsia                                                                       | ?                       | -                | +                    | -                                                                |
| Raghavendra (2007) <sup>11</sup>   | M/45            | R                   | Hemianopsia                                                                       | ?                       | -                | -                    | -                                                                |
| Taban (2007) <sup>12</sup>         | M/68            | L                   | Hemianopsia                                                                       | -                       | +                | -                    | Visual distortion, photopsia                                     |
| Pérez Saldaña (2007) <sup>13</sup> | M/51            | L                   | Inferior quadrantanopsia                                                          | ?                       | +                | -                    | -                                                                |
| Del Felice (2009) <sup>14</sup>    | F/50            | R                   | Hemianopsia                                                                       | ?                       | -                | -                    | Visual distortion, diplopia                                      |
| Mitchell (2009) <sup>15</sup>      | F/67            | L                   | Hemianopsia                                                                       | +                       | -                | +                    | -                                                                |
| Moien-Afshari (2009) <sup>16</sup> | M/83            | ?                   | Inferior quadrantanopsia                                                          | ?                       | +                | -                    | -                                                                |
| Hung (2010) <sup>17</sup>          | M/30            | L                   | Hemianopsia                                                                       | ?                       | +                | +                    | Visual distortion                                                |
| Guez (2010) <sup>18</sup>          | F/61            | L                   | Hemianopsia                                                                       | ?                       | -                | +                    | Saw herself in the TV                                            |
| Kim (2011) <sup>19</sup>           | F/65            | L                   | Hemianopsia                                                                       | ?                       | -                | -                    | -                                                                |
| Goto (2011) <sup>20</sup>          | M/56            | L                   | Hemianopsia                                                                       | ?                       | -                | +                    | -                                                                |
| Chen (2011) <sup>21</sup>          | F/58            | L                   | Hemianopsia                                                                       | ?                       | -                | +                    | -                                                                |
| Chen (2011) <sup>21</sup>          | M/61            | R                   | Hemianopsia                                                                       | ?                       | -                | -                    | Visual blurring                                                  |
| Fletcher (2011) <sup>22</sup>      | F/70            | R                   | Hemianopsia                                                                       | ?                       | -                | +                    | -                                                                |
| Stayman (2012) <sup>23</sup>       | M/45            | L                   | Hemianopsia                                                                       | ?                       | -                | -                    | -                                                                |
| Stayman (2012) <sup>23</sup>       | M/60            | L                   | Hemianopsia                                                                       | ?                       | -                | -                    | -                                                                |
| Stayman (2012) <sup>23</sup>       | M/69            | R                   | Hemianopsia                                                                       | ?                       | -                | +                    | -                                                                |
| Kocasay Orhan (2013) <sup>24</sup> | M/73            | R                   | Hemianopsia                                                                       | ?                       | -                | -                    | -                                                                |
| Putta (2014) <sup>25</sup>         | M/66            | R                   | Hemianopsia                                                                       | ?                       | -                | +                    | Mathematical figures in peripheral vision and people in his home |
| Strowd (2014) <sup>26</sup>        | F/32            | L                   | Hemianopsia                                                                       | -                       | +                | +                    | -                                                                |
| Strowd (2014) <sup>26</sup>        | F/41            | L                   | Hemianopsia                                                                       | -                       | -                | -                    | -                                                                |
| Sasaki (2016) <sup>27</sup>        | M/65            | R                   | Inferior quadrantanopsia                                                          | ?                       | +                | -                    | -                                                                |
| Nissa (2016) <sup>28</sup>         | M/53            | R                   | Hemianopsia                                                                       | +                       | -                | +                    | -                                                                |
| Walden (2017) <sup>29</sup>        | M/56            | R                   | Hemianopsia                                                                       | ?                       | -                | -                    | -                                                                |
| López-Amorós (2018) <sup>30</sup>  | F/62            | L                   | Inferior quadrantanopsia                                                          | -                       | +                | -                    | -                                                                |
| Adjepong (2019) <sup>31</sup>      | M/49            | L                   | Hemianopsia                                                                       | ?                       | -                | +                    | -                                                                |

\*Macular sparing while in the presence of inferior quadrantanopsia.

F: female, L: left, M: male, OS: left eye, OU: both eyes, R: right.

## REFERENCES

- Maccario M. Neurological dysfunction associated with nonketotic hyperglycemia. *Arch Neurol* 1968;19:525-534.
- Berkovic SF, Bladin PF, Darby DG. Metabolic disorders presenting as stroke. *Med J Aust* 1984;140:421-424.
- Johnson SF, Loge RV. Palinopsia due to nonketotic hyperglycemia. *West J Med* 1988;148:331-332.
- Harden CL, Rosenbaum DH, Daras M. Hyperglycemia presenting with occipital seizures. *Epilepsia* 1991;32:215-220.
- Duncan MB, Jabbari B, Rosenberg ML. Gaze-evoked visual seizures in nonketotic hyperglycemia. *Epilepsia* 1991;32:221-224.
- Brazis PW, Lee AG, Graff-Radford N, Desai NP, Eggenberger ER. Homonymous visual field defects in patients without corresponding structural lesions on neuroimaging. *J Neuroophthalmol* 2000;20:92-96.
- Seo DW, Na DG, Na DL, Moon SY, Hong SB. Subcortical hypointensity in partial status epilepticus associated with nonketotic hyperglycemia. *J Neuroimaging* 2003;13:259-263.
- Freedman KA, Polepalle S. Transient homonymous hemianopia and positive visual phenomena in nonketotic hyperglycemic patients. *Am J Ophthalmol* 2004;137:1122-1124.
- Lavin PJ. Hyperglycemic hemianopia: a reversible complication of non-ketotic hyperglycemia. *Neurology* 2005;65:616-619.
- Wang CP, Hsieh PF, Chen CC, Lin WY, Hu WH, Yang DY, et al. Hyperglycemia with occipital seizures: images and visual evoked potentials. *Epilepsia* 2005;46:1140-1144.
- Raghavendra S, Ashalatha R, Thomas SV, Kesavadas C. Focal neuronal loss, reversible subcortical focal T2 hypointensity in seizures with a nonketotic hyperglycemic hyperosmolar state. *Neuroradiology* 2007;49:299-305.
- Taban M, Naugle RI, Lee MS. Transient homonymous hemianopia and positive visual phenomena in patients with nonketotic hyperglycemia. *Arch Ophthalmol* 2007;125:845-847.
- Pérez Saldaña MT, Geffner D, Vilar Fabra C, Martínez Bernat I. [Visual episodes in non-ketonic hyperglycemia: contribution of 1 case with alteration in diffusion magnetic resonance imaging]. *Neurologia* 2007;22:61-65.
- Del Felice A, Zanoni T, Avesani M, Formaggio E, Storti S, Fiaschi A, et al. EEG-fMRI coregistration in non-ketotic hyperglycemic occipital seizures. *Epilepsy Res* 2009;85:321-324.
- Mitchell JB, Yancy A, Saint Louis L, Rosberger DF. Reversible hyperglycemic homonymous hemianopia. *J Natl Med Assoc* 2009;101:373-376.
- Moien-Afshari F, Téllez-Zenteno JF. Occipital seizures induced by hyperglycemia: a case report and review of literature. *Seizure* 2009;18:382-385.
- Hung WL, Hsieh PF, Lee YC, Chang MH. Occipital lobe seizures related to marked elevation of hemoglobin A1C: report of two cases. *Seizure* 2010;19:359-362.
- Guez A, Obadia M, Lafitte F, Tin SN, Héran F, Gout O. Magnetic resonance spectroscopy findings in a case of hyperglycaemic hemianopia. *Rev Neurol (Paris)* 2010;166:737-740.
- Kim DW, Moon Y, Gee Noh H, Choi JW, Oh J. Blood-brain barrier disruption is involved in seizure and hemianopsia in nonketotic hyperglycemia. *Neurologist* 2011;17:164-166.
- Goto H, Kumagai T, Momozaki N. MRI findings of occipital seizures in non-ketotic hyperglycemia. *Intern Med* 2011;50:367-368.
- Chen CC, Chai JW, Wu CH, Chen WS, Hung HC, Lee SK. Neuroimaging in seizure patients associated with nonketotic hyperglycemia. *Neuroradiol J* 2011;24:215-220.
- Fletcher P, Pereira A. Visual hallucination of coloured numbers secondary to hyperglycaemia. *BMJ Case Rep* 2011;2011:bcr0820103268.
- Stayman A, Lavin P, Abou-Khalil B, Azar N. Video-EEG and FDG-PET confirm the ictal nature of prolonged homonymous hemianopia in non-ketotic hyperglycemia – report of three patients. *Neurology* 2012;78:P03.114.
- Kocasay Orhan E, Atmaca MM, Atmaca M, Hanağasi HA. Chorea-ballismus associated with hyperglycemia. *Noro Psikiyatr Ars* 2013;50:375-378.
- Putta SL, Weisholtz D, Milligan TA. Occipital seizures and subcortical T2 hypointensity in the setting of hyperglycemia. *Epilepsy Behav Case Rep* 2014;2:96-99.
- Strowd RE, Wabnitz A, Balakrishnan N, Craig J, Tegeler CH. Clinical reasoning: acute-onset homonymous hemianopia with hyperglycemia: seeing is believing. *Neurology* 2014;82:e129-e133.
- Sasaki F, Kawajiri S, Nakajima S, Yamaguchi A, Tomizawa Y, Noda K, et al. Occipital lobe seizures and subcortical T2 and T2\* hypointensity associated with nonketotic hyperglycemia: a case report. *J Med Case Rep* 2016;10:228.
- Nissa Z, Siddiqi SA, Abdool SA. Occipital seizures and persistent homonymous hemianopia with T2 hypointensity on MRI in nonketotic hyperglycemia. *Epilepsy Behav Case Rep* 2016;6:3-5.
- Walden J, Van Williamson E. (Almost) lost at SEA: an unusual cause of cortical blindness. *Neurodiagn J* 2017;57:47-52.
- López-Amorós A, Medrano-Martínez V, Francés-Pont I, Hernández-Rubio L, González-Fernández L, Fernández-Izquierdo S, et al. Reversible Homonymous inferior quadrantanopia in a nonketotic hyperglycemic patient. *Neuroophthalmology* 2018;44:45-48.
- Adjepong K, Boxerman J, Roth JL. Seeing stars: acute repetitive occipital seizures in hyperglycemia. *Neurographics* 2019;9:75-78.
